# Supplementary material for: Use of and Retention on Video, Telephone, and In-Person Buprenorphine Treatment for Opioid Use Disorder During the COVID-19 Pandemic
Source: PubMed Central journal article supplement (PMC9557869; doi:10.1001/jamanetworkopen.2022.36298), 2022-10-12
Supplement: jamanetwopen-e2236298-s001.pdf [file jamanetwopen-e2236298-s001.pdf]

## Supplemental Online Content

Frost MC, Zhang L, Kim HM, Lin LA. Use of and retention on video, telephone, and in-person buprenorphine treatment for opioid use disorder during the COVID-19 pandemic. *JAMA Netw Open*. 2022;5(10):e2236298. doi:10.1001/jamanetworkopen.2022.36298

**eTable 1.** Definitions of Measures Using Diagnostic Codes and/or Clinic Visit Codes

**eTable 2.** Association Between Treatment Modality and 90-Day Retention Among VHA Patients Who Received Buprenorphine for OUD in the Year Following COVID-19-Related Changes

This supplemental material has been provided by the authors to give readers additional information about their work.

**eTable 1. Definitions of measures using diagnostic codes and/or clinic visit codes**

| <b>Measure</b>                                                                                 | <b>Definition</b>                                                                                                                                                                                                                                                                                                                                                                                           |
|------------------------------------------------------------------------------------------------|-------------------------------------------------------------------------------------------------------------------------------------------------------------------------------------------------------------------------------------------------------------------------------------------------------------------------------------------------------------------------------------------------------------|
| Opioid use disorder                                                                            | <u>ICD-10-CM codes:</u><br>F11*                                                                                                                                                                                                                                                                                                                                                                             |
| Video telehealth modality                                                                      | <u>Clinic visit codes (secondary):</u><br>690, 692, 693, 699, 644, 645, 136, 137, 444, 445, 446, 447, 440, 708, 723, 724, 490, 491, 179, 679, 648<br>Or with CPT modifier = GT/95                                                                                                                                                                                                                           |
| Telephone telehealth modality                                                                  | <u>CPT codes:</u><br>99441, 99442, 99443<br>or<br><u>Clinic visits codes (primary):</u><br>545, 527, 338 (or other codes with 'phone' in the name which including:<br>103, 147, 148, 169, 178, 181, 182, 199, 216, 221, 229, 324, 325, 326, 424, 425, 428, 441, 451, 452, 453, 454, 462, 463, 476, 526, 527, 528, 530, 536, 537, 542, 543, 544, 545, 546, 579, 584, 597, 609, 611, 686, 729, 801, 802, 803) |
| Homelessness and/or housing instability                                                        | <u>ICD-10-CM codes:</u><br>Z59.0, Z59.1, Z59.3, Z59.8, Z59.9<br><u>Clinic visit codes:</u><br>504, 507, 508, 511, 522, 528, 529, 530, 555, 556, 590, 76, 453, 455, 458, 460, 501                                                                                                                                                                                                                            |
| Alcohol use disorder                                                                           | <u>ICD-10-CM codes:</u><br>F10*                                                                                                                                                                                                                                                                                                                                                                             |
| Stimulant use disorder                                                                         | <u>ICD-10-CM codes:</u><br>F14*, F15*                                                                                                                                                                                                                                                                                                                                                                       |
| Cannabis use disorder                                                                          | <u>ICD-10-CM codes:</u><br>F12*                                                                                                                                                                                                                                                                                                                                                                             |
| Other drug use disorder (sedative, hallucinogen, inhalant and/or other psychoactive substance) | <u>ICD-10-CM codes:</u><br>F13*, F16*, F18*, F19*                                                                                                                                                                                                                                                                                                                                                           |
| Depressive disorder                                                                            | <u>ICD-10-CM codes:</u><br>F32*, F33*                                                                                                                                                                                                                                                                                                                                                                       |
| Post-traumatic stress disorder                                                                 | <u>ICD-10-CM codes:</u><br>F43.1*                                                                                                                                                                                                                                                                                                                                                                           |
| Other anxiety disorder                                                                         | <u>ICD-10-CM codes:</u><br>F06.4, F40*, F41*, F42*, F43*, F45.2*, R45.7                                                                                                                                                                                                                                                                                                                                     |
| Serious mental illness (bipolar disorder, psychosis and/or schizophrenia)                      | <u>ICD-10-CM codes:</u><br>F20*, F25*, F22, F23, F24, F28, F29, F53.1, F06.0, F06.2, F06.3*, F30*, F31*                                                                                                                                                                                                                                                                                                     |

ICD-10-CM = International Classification of Diseases, 10th Revision, Clinical Modification; CPT = Current Procedural Terminology

\* Indicates inclusion of all sub-codes under parent code

**eTable 2. Association between treatment modality and 90-day retention among VHA patients who received buprenorphine for OUD in the year following COVID-19-related changes**

|                                                                   | All patients<br>(N=17,182)                                                               |              | Patients with any telehealth visits<br>(N=15,071)                                   |              |
|-------------------------------------------------------------------|------------------------------------------------------------------------------------------|--------------|-------------------------------------------------------------------------------------|--------------|
|                                                                   | aOR <sup>a</sup> for retained ≥90 days<br>(predictor: any telehealth vs. in-person only) | 95% CI       | aOR <sup>a</sup> for retained ≥90 days<br>(predictor: any video vs. telephone only) | 95% CI       |
| Initiated in year following COVID<br>(N=4,338 among all patients) | 1.31                                                                                     | (1.12, 1.53) | 1.47                                                                                | (1.26, 1.71) |
| Initiated prior to COVID<br>(N=12,844 among all patients)         | 1.23                                                                                     | (1.08, 1.39) | 1.06                                                                                | (0.98, 1.13) |

aOR = adjusted odds ratio; CI = confidence interval; OUD = opioid use disorder; VHA = Veterans Health Administration

<sup>a</sup>Adjusted for age, sex, race, ethnicity, VHA eligibility status, rurality of patient residence, homelessness and/or housing instability, alcohol use disorder, cannabis use disorder, stimulant use disorder, other drug use disorder (sedative, hallucinogen, inhalant and/or other psychoactive substance), depressive disorder, post-traumatic stress disorder, other anxiety disorder, serious mental illness (bipolar disorder, psychosis and/or schizophrenia), and number of Elixhauser comorbidities (excluding OUD).
